# Supplementary material
Source: Research Square preprint supplement (doi:10.21203/rs.3.rs-9349578/v1)
Supplement: Supplementary file 1 [file 3414756937425150f162cea8.docx]

**Questionnaire used to collect KAP data of dairy farmers on veterinary drug residue and AMR**

**SECTION I) SOCIO-DEMOGRAPHIC INFORMATION**

Address:

1) Zone: ___________

2) District: ___________

3) Sex:

a) male

b) female

4) Age (years): ____________________________

a) 18-21

b) 26-33

c) 34-41

d) 42-49

e) 50-57

f) 58-65

g) ˃65

5) Education:

a) No formal education

b) Grade 1-4

c) Grade 5-8

d) Grade 9-12

e) Diploma

f) First degree or above

6) Occupation:

a) Exclusively dairy cattle farming

b) Dairy cattle farming and civil servant

c) Mixed livestock farming (dairy cattle and other animals)

d) Dairy cattle farming and student

e) Dairy cattle and crop farming

f) Dairy cattle farming and business (e.g. merchant)

g) Other (specify): _______________________

7) Farm size (number of cows per farm):

a) 1-5 cows

b) 5-10 cows

c) 10-50 cows

d) >50 cows

8) Year of Farm Establishment__________________________________

9 profession (if applicable):

a) Animal Science/animal production

b) Animal Health

c) Human Health

d) Environmental science

e) Crop science

f) Plant science

g) Economics

h) Social science

i) Engineering

j) no professional background

k) Other (specify)________________

**SECTION II) KNOWLEDGE ON ANTIMICROBIAL USE AND RESISTANCE**

*Instruction: Please select one answer for each statement*

1. Have you ever heard about antimicrobial resistance (AMR) or drug resistant bacteria?

a. Yes

b. No

2. If your answer for question No 1 is ‘Yes’, what are your source of information? *(You may select more than one)*

a) Academic training (curriculum)

b) Television or Radio

c) Internet or social media

d) Private Veterinarian

e) Government-employed expert

f) Friend /family

g) Other (specify)______________

3. Misuse of veterinary drugs in dairy cattle can contribute to AMR.

a) Yes

b) No

c) Don’t know

4. If bacteria are resistant to antimicrobials, it can be very difficult to treat the infections they caused.

a) Yes

b) No

c) Don’t know

5. An incomplete full course of antimicrobial treatment contributes to antimicrobial resistance (AMR).

a) Yes

b) No

c) Don’t know

6. Antimicrobial-resistant bacteria can be spread from animal to animal.

a) Yes

b) No

c) Don’t know

7. Antimicrobial-resistant bacteria can pass from dairy cattle to humans through raw or undercooked milk and milk products.

a) Yes

b) No

c) Don’t know

8. Humans can acquire antimicrobial-resistant bacteria from dairy cattle environment (e.g. feces, soil, equipment).

a) Yes

b) No

c) Don’t know

9. Humans can acquire antimicrobial-resistant bacteria from water contaminated with dairy cattle waste.

a) Yes

b) No

c) Don’t know

10. Veterinary drug residues consumed in cattle milk can pose health risks to humans.

a) Yes

b) No

c) Don’t know

11. Veterinary drug residues consumed in cattle milk can create antimicrobial resistant bacteria in human.

a) Yes

b) No

c) don’t know

12. Treatment regimen can be reduced or suspended as soon as symptoms disappear in your dairy cattle.

a) Yes

b) No

c) Don’t know

13. Improper disposal of leftover or expired veterinary drugs can cause drug residues in nature/the environment.

a) Yes

b) No

c) Don’t know

14. Improper disposal of leftover or expired veterinary drugs can be a source of AMR development in the environment.

a) Yes

b) No

c) Don’t know

15. Milk from cows under treatment with veterinary drugs, can be used for human consumption.

a) Yes

b) No

c) Don’t know

16. Veterinary drugs can be bought and given for milking cows without veterinarian’s prescription.

a) Yes

b) No

c) don’t know

17. Using leftover antimicrobials from other cows is acceptable if symptoms look similar.

a) Yes

b) No

c) Don’t know

**Section III: Attitudes toward antimicrobial use and AMR**

*For each statement, choose how strongly you agree or disagree.*

**Response options:** 1 = Strongly Agree 2 = Agree 3 = Uncertain 4 = Disagree 5 = Strongly Disagree

| S.N | Attitude statements | 1 | 2 | 3 | 4 | 5 |
| --- | --- | --- | --- | --- | --- | --- |
| 1 | Irrational use of veterinary drugs in dairy cattle contributes to AMR. |  |  |  |  |  |
| 2 | Antimicrobial-resistant bacteria can spread to humans through consumption of raw or undercooked milk and milk products. |  |  |  |  |  |
| 3 | Infections caused by antimicrobial resistant bacteria are difficult to treat. |  |  |  |  |  |
| 4 | Humans can acquire resistant bacteria from dairy environments. |  |  |  |  |  |
| 5 | Drug residues in milk can contribute to developing drug resistant bacteria in humans. |  |  |  |  |  |
| 6 | Drug residues in milk can cause health problems in humans. |  |  |  |  |  |
| 7 | It is acceptable to use leftover drugs for cows with similar symptoms. |  |  |  |  |  |
| 8 | Improper disposal of expired drugs can contribute to AMR. |  |  |  |  |  |
| 9 | Milk from cows under drug treatment should never be used for human consumption. |  |  |  |  |  |
| 10 | Observing withdrawal time is essential for milk safety. |  |  |  |  |  |
| 11 | Poor record-keeping contributes to drug residues in milk. |  |  |  |  |  |
| 12 | **F**ailure to follow instructions of the manufacturer and veterinarian leads to drug residues. |  |  |  |  |  |
| 13 | Contaminated water with dairy waste can transmit drug resistant foodborne pathogens. |  |  |  |  |  |

**Section IV: Practices addressing antimicrobial use and resistance**

1. Have your dairy cattle been treated in the last 12 months?

a) Yes

b) No

2. Please mention the drug you commonly used __________________________

3. Have you ever bought veterinary drugs without prescription or professional consultation?

a) Yes, always

b) Yes, sometimes

c) No

4. Have you ever bought drugs from human pharmacies for your cattle?

a) Yes, always

b) Yes, sometimes

c) No

5. Have you ever administered orally Veterinary drugs to your dairy cattle without professional consultation?

a) Yes, always

b) Yes, sometimes

c) No

6. Have you ever applied topically Veterinary drugs to your dairy cattle without professional consultation?

a) Yes, always

b) Yes, sometimes

c) No

7. Have you ever injected your dairy cattle yourself?

a) Yes, always

b) Yes, sometimes

c) No

8. Have you ever stored leftover drugs for use of future illness episodes?

a) Yes, always

b) Yes, sometimes

c) No

9. Have you ever reduced or suspended treatment regimen as soon as symptoms disappear in your dairy cattle?

a) Yes, always

b) Yes, sometimes

c) No

10. Have you ever disposed of any leftover or expired drugs appropriately?

a) Yes, always

b) Yes, sometimes

c) No

11. Have you ever consumed or sold milk of a cow under treatment with veterinary drugs?

a) Yes, always

b) Yes, sometimes

c) No

12. Have you ever practiced drug withdrawal time for your milking cow?

a) Yes, always

b) Yes, sometimes

c) No
